# Supplementary material for: Label-free microRNA detection based on terbium and duplex-specific nuclease assisted target recycling
Source: Royal Society of Chemistry journal article supplement (doi:10.1039/c5an01042j), 2015-01-01
Supplement: c5an01042j1.pdf [file c5an01042j1.pdf]

**Table S1 Details of the DNA sequences**

---

|                                    |                                            |
|------------------------------------|--------------------------------------------|
|                                    | 5'-biotin-                                 |
| Capture probe (Cp)                 | TTTTTTT <u><b>TCAACATCAGTCTGATAAGC</b></u> |
|                                    | <u><b>TATGGGTGGGTGGGTGGGTGGG</b></u> -3'   |
| miR-21                             | 5'- UAGCUUAUCAGACUGAUGUUGA-3'              |
| Single-base mismatched miR-21 (SM) | 5'- UA <u>C</u> CUUAUCAGACUGAUGUUGA-3'     |
| noncomplementary miR-21 (NM)       | 5'- ACUGAAUAGUCUAAAUAUAAUT -3'             |
| miR-141                            | 5'-UAACACUGUCUGGUAAGAUGG-3'                |
| miR-143                            | 5'- GAGAUGAAGCACUGUAGCUCA -3'              |

---

The underlined bold letters, italic bold letters and underlined letter represent target-binding sequence, signal output sequence and mismatched base, respectively.

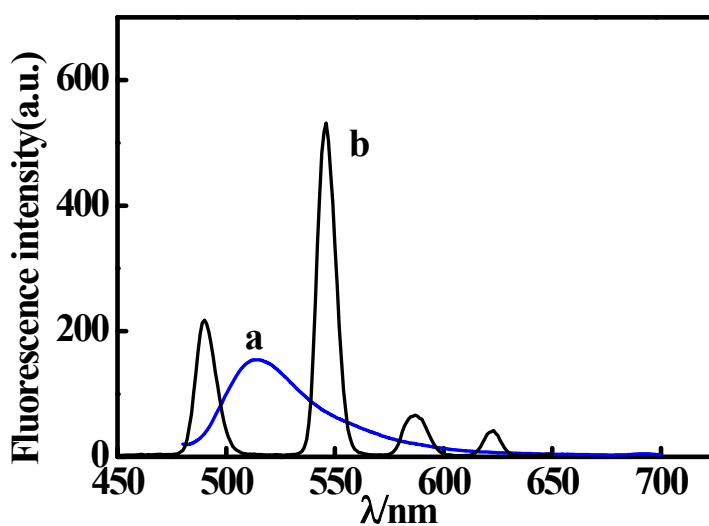

Figure S1 Investigated the fluorescence intensity of the proposed method and the FAM labelling approach at the same concentration of pure Cp. The concentration of Cp was 1  $\mu$ M. The reactive time and temperature were 150 min and 50  $^{\circ}$ C.

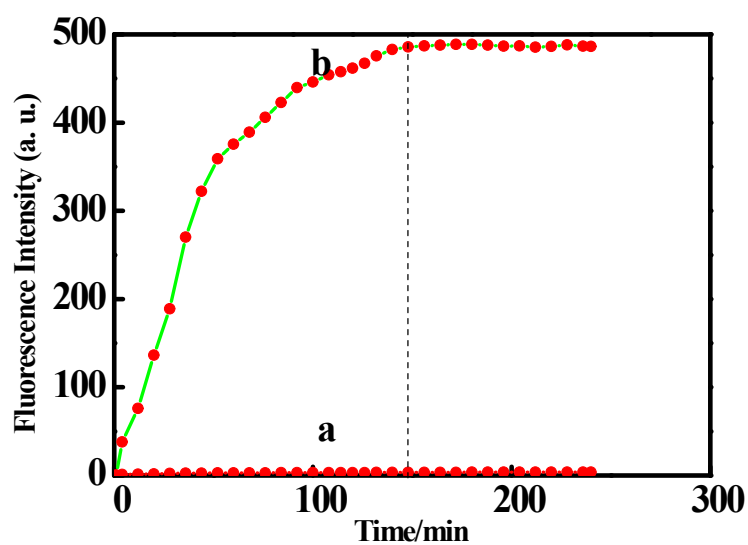

**Figure S2** Real-time monitoring of detection system containing 1  $\mu$ M Cp and 0.2 U DSN in the absence (a) or presence (b) of 1 pM miR-21.

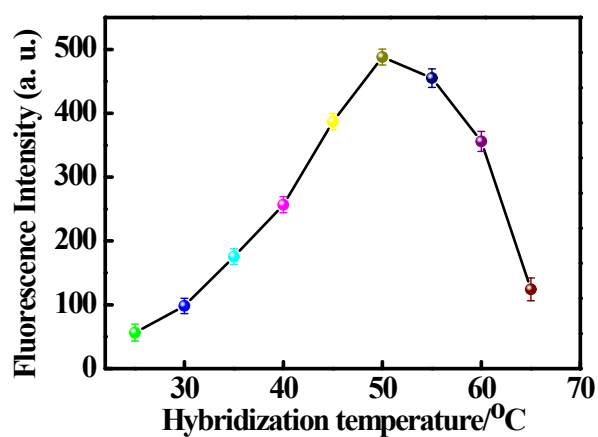

**Figure S3** Influence of the reactive temperature. The concentration of Cp, miR-21 and DSN were 1  $\mu$ M, 1 pM, and 0.2 U, respectively. Each data point represents the average value of three independent experiments with error bars indicated.

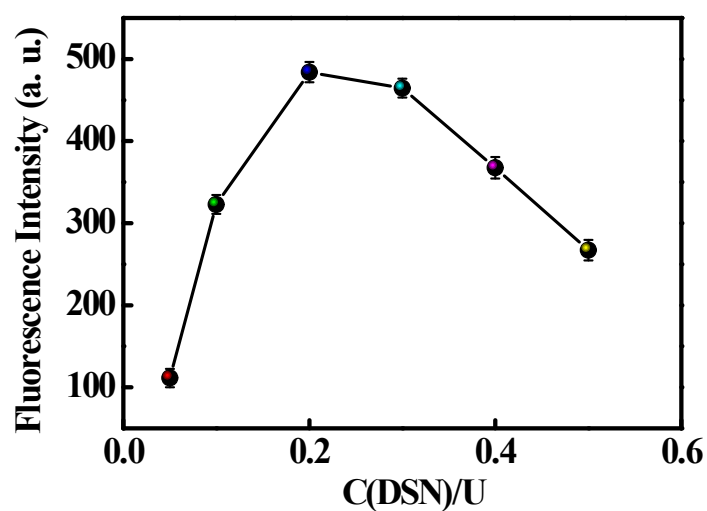

**Figure S4** Influence of the concentration of DSN. The concentration of Cp and miR-21 were 1  $\mu\text{M}$ , 1 pM, respectively. Each data point represents the average value of three independent experiments with error bars indicated.

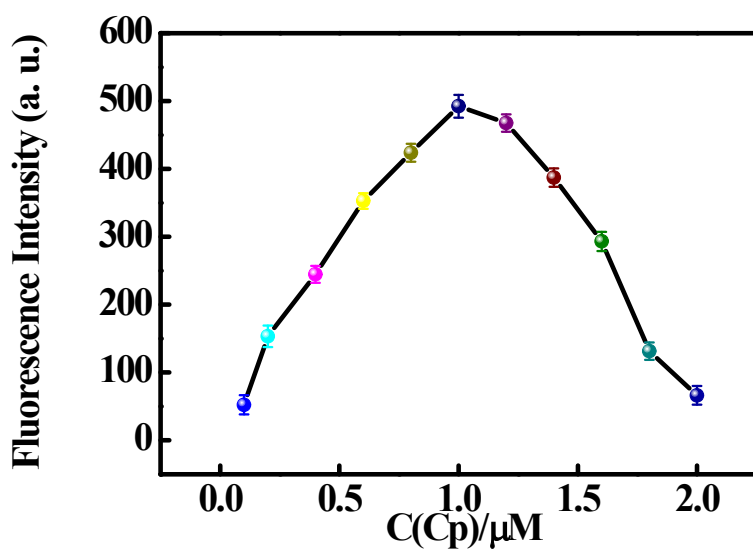

**Figure S5** Influence of the surface density of MBs on the fluorescence intensity. The concentration of  $\text{Tb}^{3+}$ , miR-21 and DSN were 5  $\mu\text{M}$ , 1 pM, and 0.2 U, respectively. Each data point represents the average value of three independent experiments with error bars indicated.

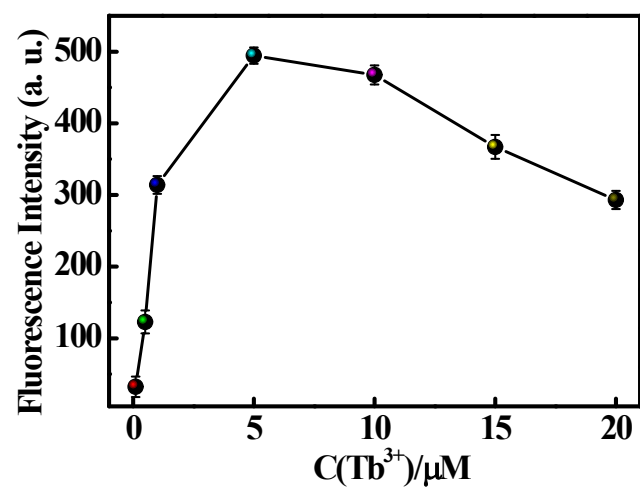

**Figure S6** Influence of the concentration of Tb<sup>3+</sup> on the fluorescence intensity. The concentration of Cp, miR-21 and DSN were 1 μM, 1 pM, and 0.2 U, respectively. Each data point represents the average value of three independent experiments with error bars indicated.

Table S2. The detection limit for miR-21 of this method and some different detection methods

| Method           | Detection limit | Refs.                    |
|------------------|-----------------|--------------------------|
| Fluorescence     | 100 fM          | Yin et al., 2012         |
| Fluorescence     | 5 pM            | Degliangeli et al., 2014 |
| Fluorescence     | 300 fM          | Xi et al., 2014          |
| Electrochemistry | 67 fM           | Dong et al., 2012        |
| Electrochemistry | 10 fM           | Wang et al., 2012        |
| Electrochemistry | 10 fM           | Gao and Peng, 2011       |
| Electrochemistry | 60 fM           | Yin et al., 2012         |
| Colorimetry      | 10 nM           | Zhang et al., 2009       |
| Fluorescence     | 1.0fM           | Yan et al., 2014         |
| Electrochemistry | 1.0fM           | Ren et al., 2013         |
| Electrochemistry | 3.0fM           | Yang et al., 2014        |
| chemiluminescent | 10fM            | Deng et al., 2013        |
| Colorimetry      | 0.1fM           | Deng et al., 2014        |
| Fluorescence     | 0.4pM           | Lin et al., 2013         |
| Fluorescence     | 60fM            | Shen et al., 2015        |
| Fluorescence     | 8 fM            | This work                |

## References

- Degliangeli, F., Kshirsagar, P., Brunetti, V., Pompa, P. P., Fiammengo, R., *J. Am. Chem. Soc.*, 2014, **136**, 2264-2267.
- Dong, H., Jin, S., Ju, H., Hao, K., Xu, L. P., Lu, H., Zhang, X., *Anal. Chem.*, 2012, **84**, 8670-8674.
- Gao, Z., Peng, Y., *Biosens. Bioelectron.*, 2011, **26**, 3768-3773.
- Wang, J., Yi, X., Tang, H., Han, H., Wu, M., Zhou, F., *Anal. Chem.*, 2012, **84**, 6400-6406.
- Xi, Q., Zhou, D. M., Kan, Y. Y., Ge, J., Wu, J. K., Yu, R. Q., Jiang, J. H., *Anal. Chem.*, 2014, **86**, 1361-1365.
- Yin, B. C., Liu, Y. Q., Ye., B. Ce., *J. Am. Chem. Soc.*, 2012, **134**, 5064-5067.
- Yin, H., Zhou, Y., Zhang, H., Meng, X., Ai, S., *Biosens. Bioelectron.*, 2012, **33**, 247-253.
- Zhang, Y., Li, Z., Cheng, Y., Lv, X., *Chem. Commun.*, 2009, **22**, 3172-3174.
- Yan L., Yan Y. Y., Pei L., Wei W., Zhao J., *Scientific Reports*, 2014, **4**, 7400.
- Ren Y. Q., Deng H. M., Shen W., Gao Z. Q., *Anal. Chem.*, 2013, **85**, 4784-4789.
- Yang C. Y., Dou B. T., Shi K., Chai Y. Q., Xiang Y., Yuan R., *Anal. Chem.*, 2014, **86**, 11913-11918.
- Deng H. M., Ren Y. Q., Shen W., Gao Z. Q., *Chem. Commun.*, 2013, **49**, 9401-9403.
- Deng H. M., Shen W., Ren Y. Q., Gao Z. Q., *Biosens. Bioelectron.*, 2014, **54**, 650-655.
- Lin X. Y., Zhang C., Huang Y. S., Zhu Z., Chen X., Yang C. J., *Chem. Commun.*, 2013, **49**, 7243-7245.
- Shen W., Yeo K. H., Gao Z. Q., *Analyst*, 2015, **140**, 1932-1938.
